# Left Ventricular Diastolic Dysfunction in Patients with Subclinical Hypothyroidism

BERNADETTE BIONDI, SERAFINO FAZIO, EMILIANO ANTONIO PALMIERI,  
CARLO CARELLA, NICOLA PANZA, ANTONIO CITTADINI, FILOMENA BONÈ,  
GAETANO LOMBARDI, AND LUIGI SACCA

Departments of Internal Medicine (S.F., E.A.P., A.C., F.B., L.S.) and Endocrinology (B.B., N.P., G.L.) of the University Federico II, and Department of Endocrinology (C.C.) of the Second University, Naples, Italy

## ABSTRACT

Although subclinical hypothyroidism is frequently diagnosed, the decision to institute a substitutive therapy with L-T<sub>4</sub> remains controversial. Because the cardiovascular system is considered a main target for the action of thyroid hormone, we investigated whether subclinical hypothyroidism induces cardiovascular abnormalities.

Twenty-six patients (mean age, 36 ± 12 yr) were evaluated by Doppler-echocardiography, whereas a subgroup of 10 patients, randomly selected, were reevaluated after 6 months of L-T<sub>4</sub> substitutive therapy (mean dose, 68 μg daily). Thirty subjects (matched for age, sex, and body surface area) served as controls.

Mean plasma TSH was significantly higher in patients ( $P < 0.001$ ), whereas mean serum free T<sub>4</sub> and free T<sub>3</sub> concentrations, although in the normal range, were significantly lower ( $P < 0.001$  and  $P < 0.005$ , respectively). Blood pressure and heart rate did not differ from control values. Echocardiogram examination showed no abnormalities of the left ventricular morphology and a slight, but not significant, reduction in the systolic function in the patient group. In contrast, Doppler-derived indices of diastolic function showed significant prolongation

of the isovolumic relaxation time ( $94 \pm 13$  vs.  $84 \pm 8$  msec;  $P < 0.001$ ), increased A wave ( $55 \pm 13$  vs.  $48 \pm 9$  cm/sec;  $P < 0.05$ ), and reduced early diastolic mitral flow velocity/late diastolic mitral flow velocity ratio ( $1.4 \pm 0.3$  vs.  $1.7 \pm 0.3$ ;  $P < 0.001$ ). In the subgroup of 10 patients, thyroid hormone profile was normalized by 6 months of L-T<sub>4</sub> substitutive therapy, whereas no changes were observed in the left ventricular morphology. Systolic function was significantly enhanced, as compared with pretreatment values ( $P < 0.01$ ) but did not differ from control values. Also, systemic vascular resistance was significantly decreased by L-T<sub>4</sub> replacement therapy. Assessment of diastolic function showed significant shortening of isovolumic relaxation time ( $77 \pm 15$  vs.  $91 \pm 8$ ;  $P < 0.05$ ), reduction of A wave ( $51 \pm 13$  vs.  $60 \pm 12$ ;  $P < 0.01$ ), and increase of early diastolic mitral flow velocity/late diastolic mitral flow velocity ratio ( $1.7 \pm 0.4$  vs.  $1.3 \pm 0.3$ ;  $P < 0.001$ ). These indices, however, were comparable with those of control subjects.

These findings indicate that subclinical hypothyroidism affects diastolic function and that this abnormality may be reversed by L-T<sub>4</sub> substitutive therapy. (*J Clin Endocrinol Metab* 84: 2064–2067, 1999)

**S**UBCLINICAL hypothyroidism (SHypo) is characterized by variably increased serum TSH concentration with apparently normal serum free T<sub>4</sub> (F-T<sub>4</sub>) and free T<sub>3</sub> (F-T<sub>3</sub>) levels. It occurs in 10–15% of the general population (1).

The clinical presentation of SHypo is nonspecific, and the symptoms are usually subtle, as compared with those of overt hypothyroidism, probably in relation to the intensity and the duration of thyroid hormone deficiency and the age of the patients.

The decision to treat the patients affected by SHypo with substitutive L-T<sub>4</sub> therapy remains controversial (1–3) and mainly dependent on the physician's attitude (to consider the disease as a mild form of tissue hypothyroidism or as a compensatory state, in which the increase of TSH is required to maintain normal circulating thyroid hormone concentrations). Indeed, reports on the efficacy of replacement therapy with levothyroxine (L-T<sub>4</sub>) on the lipid abnormalities in the patients with SHypo have shown conflicting results (4–10). However, although it is difficult to establish a cutoff for TSH values that clearly indicates the need to institute a substitutive

therapy with L-T<sub>4</sub>, the treatment is generally recommended in the presence of a serum TSH level of 10 mU/L or more (2, 11, 12). When the TSH level is less than 10 mU/L, the treatment may be indicated in relation to the presence of goiter or antithyroid antibodies to prevent the onset of overt hypothyroidism more than to tissue assessment of thyroid hormone deficiency (1).

Considering the high prevalence of SHypo and the well-established cardiac consequences of altered thyroid status, in the present study, we investigated whether SHypo causes cardiovascular abnormalities. To this aim, we assessed cardiac morphology and function, using noninvasive methods, in patients with SHypo before and after L-T<sub>4</sub> substitutive therapy.

## Subjects and Methods

The study was performed by means of Doppler-echocardiography in 26 patients with SHypo and in 30 normal control subjects.

SHypo was diagnosed on the basis of TSH values above normal (see Table 1), associated with a supranormal response to TRH ( $\Delta$ TSH above 30 mU/L), and FT<sub>3</sub> and FT<sub>4</sub> in the lower limit of the normal range. Only the patients with stable TSH and thyroid hormone levels for at least 6 months before the enrollment and with a positive test for serum antithyroid peroxidase antibodies were included in the study. TSH and thyroid hormone levels were considered stable if their variations were lower than 20% in three consecutive evaluations performed in the 6 months before study. Patients and normal volunteers had a sedentary life-style, none of them had a history of cardiovascular disease, and all were in sinus rhythm.

Received October 26, 1998. Revision received February 3, 1999. Accepted February 26, 1999.

Address all correspondence and requests for reprints to: Luigi Sacca, M.D., Department of Internal Medicine, via Pansini, 5, 80131 Naples, Italy.

**TABLE 1.** Characteristics of the study population

|                                   | Controls<br>(n = 30) | SHypo patients<br>(n = 26) |
|-----------------------------------|----------------------|----------------------------|
| Age (yr)                          | 36 ± 11              | 36 ± 12                    |
| Sex (M/F)                         | 6/24                 | 2/24                       |
| BSA (m <sup>2</sup> )             | 1.67 ± 0.17          | 1.64 ± 0.12                |
| HR (bpm)                          | 71 ± 8               | 73 ± 9                     |
| SBP (mm Hg)                       | 125 ± 12             | 120 ± 10                   |
| DBP (mm Hg)                       | 77 ± 5               | 78 ± 7                     |
| FT <sub>4</sub> (7.7–23.2 pmol/L) | 15.3 ± 2.6           | 9.4 ± 3.0 <sup>a</sup>     |
| FT <sub>3</sub> (3.9–8.8 pmol/L)  | 6.0 ± 1.2            | 5.1 ± 1.1 <sup>b</sup>     |
| TSH (0.2–3.0 mU/L)                | 1.6 ± 0.9            | 8.6 ± 4.8 <sup>a</sup>     |

BSA, body surface area; HR, heart rate; SBP, systolic blood pressure; DBP, diastolic blood pressure.

<sup>a</sup>  $P < 0.001$ .

<sup>b</sup>  $P = 0.005$ , vs. control subjects.

A subgroup of 10 patients, randomly selected, was reevaluated after 6 months of L-T<sub>4</sub> therapy, at substitutive doses ranging from 50–100 µg daily, with a mean dose of 68 µg. None of the subjects received any medication during the study, other than L-T<sub>4</sub> for the subgroup of 10 patients previously described.

All subjects gave informed consent before participating in the study, and the protocol was approved by the Ethics Committee of the University of Naples Federico II.

#### Assessment of thyroid status

Evaluation of plasma TSH levels was performed by an ultrasensitive immunoradiometric assay (Bouty, Milan, Italy) with a detection limit of 0.05 mU/L. The intra- and interassay variations were 3.1% and 3.8% at 0.25–50 mU/L. Serum FT<sub>4</sub> and FT<sub>3</sub> were measured using the Lisophase Kits (Bouty). The intra- and interassay variations and sensitivities were 2.9%, 4.7%, and 0.8 pmol/L for FT<sub>3</sub>, respectively, and 4.1%, 5.9%, and 1.0 pmol/L for FT<sub>4</sub>.

#### Doppler-echocardiography

Complete mono- and two-dimensional, and Doppler-echocardiographic analysis was performed by an ultrasound mechanical system equipped with a 3.5-MHz transducer (Apogee CX, Interspec, Inc., Amblar, PA), as previously described (13, 14). The examinations were performed by the same operator for all participants in the study. The investigator reading the echoes was blinded as to whether the recordings he was interpreting were of hypothyroid or normal subjects.

The parameters of systolic and diastolic function, derived by echocardiography and by Doppler examination, were assessed as previously reported (14, 15). Stroke volume was obtained using the method of Teichholz *et al.* (16). Cardiac output (CO) was measured as the product of stroke volume and heart rate. Systemic vascular resistance (SVR) was calculated as follows:  $SVR = [(mPAO - mPRA) / CO] \times 80$ , where mPRA is the mean right atrial pressure, considered equal to zero mm Hg in each subject, and mPAO is the mean aortic pressure, derived by cuff-sphygmomanometer, as diastolic blood pressure + 1/3(systolic-diastolic blood pressure) (17). Furthermore, aortic peak flow velocity and mean aortic acceleration were obtained by the recording of the aortic flow velocimetry. In particular, mean aortic acceleration was obtained by dividing the peak flow velocity by the acceleration time (18).

#### Statistical analysis

All data in the text and tables are reported as the mean ± sd. Comparisons among control subjects and subclinical hypothyroid patients were performed by the two-tailed Student's *t* test for unpaired data, whereas comparisons among the subgroup of 10 subclinical hypothyroid patients, before and 6 months after L-T<sub>4</sub> treatment, were performed using the two-tailed Student's *t* test for paired data. A *P* value less than 0.05 was considered as significant.

### Results

The clinical characteristics of the study population are shown in Table 1. Patients and normal controls were well matched for

age, sex, and body surface area. Both heart rate and blood pressure were comparable in the two groups. As expected, TSH levels were significantly higher in patients than in controls. FT<sub>3</sub> and FT<sub>4</sub> levels, although in the normal range, were significantly lower in the patients than in control subjects.

As summarized in Table 2, no abnormalities were found in LV morphology and mass in the patients with SHypo.

Table 3 displays Doppler-echocardiographic resting indices of LV systolic and diastolic function. No clear evidence of systolic dysfunction was found in the patient group. The only abnormality was a significant, although mild, decrease in the mean aortic acceleration.

Doppler-derived indices of left ventricular (LV) diastolic filling showed clear abnormalities of myocardial relaxation, as indicated by significant prolongation of the isovolumic relaxation time (Fig. 1) and significant reduction of the early diastolic mitral flow velocity/late diastolic mitral flow velocity (E/A) ratio, mainly accounted for by increased A-wave of mitral flow velocity.

In the subgroup of SHypo patients receiving L-T<sub>4</sub> substitutive therapy for six months, TSH was normalized (from  $9.2 \pm 4.2$  to  $1.7 \pm 1$  mU/L,  $P < 0.005$ ), whereas FT<sub>3</sub> and FT<sub>4</sub> increased (FT<sub>3</sub>: from  $4.5 \pm 1.2$  to  $5.6 \pm 1.4$  pmol/L,  $P < 0.05$ ; FT<sub>4</sub>: from  $9.3 \pm 3.4$  to  $14.4 \pm 3.8$  pmol/L,  $P < 0.005$ ) and were no longer different from the values of control subjects.

As summarized in Tables 4 and 5, L-T<sub>4</sub> substitutive therapy did not induce significant changes in LV morphology. In con-

**TABLE 2.** Echocardiographic parameters to left ventricular morphology in subclinical hypothyroid patients and in normal subjects

|                      | Controls<br>(n = 30) | SHypo patients<br>(n = 26) |
|----------------------|----------------------|----------------------------|
| LVEDD (mm)           | 48 ± 3               | 47.5 ± 4                   |
| LVEDS (mm)           | 30.5 ± 2             | 30.5 ± 4                   |
| Diastolic IVST (mm)  | 9.2 ± 1.5            | 9.8 ± 1.7                  |
| Diastolic LVPWT (mm) | 8.5 ± 1.4            | 8.9 ± 1.1                  |
| LVMi (g)             | 83 ± 14              | 86 ± 17                    |

LVEDD, left ventricular end diastolic diameter; LVEDS, left ventricle end systolic diameter; IVST, interventricular septum thickness; LVPWT, left ventricle posterior wall thickness; LVMi, left ventricle mass corrected for body surface area.

**TABLE 3.** Doppler-echocardiographic parameters of left ventricular function in subclinical hypothyroid patients and in normal subjects

|                                                | Controls<br>(n = 30) | SHypo patients<br>(n = 26) |
|------------------------------------------------|----------------------|----------------------------|
| Systolic function                              |                      |                            |
| FS (%)                                         | 36 ± 4.0             | 36 ± 4.5                   |
| mVCF (circ/sec)                                | 1.3 ± 0.1            | 1.2 ± 0.2                  |
| Mean aortic acceleration (m/sec <sup>2</sup> ) | 10.1 ± 1.1           | 9.3 ± 1.4 <sup>a</sup>     |
| Peak aortic flow velocity (cm/sec)             | 0.9 ± 0.1            | 0.9 ± 0.2                  |
| Cardiac output µL/min                          | 5223 ± 959           | 5300 ± 1260                |
| SVR (dynes/sec · cm <sup>-5</sup> )            | 1460 ± 343           | 1470 ± 372                 |
| Diastolic function                             |                      |                            |
| E (cm/sec)                                     | 79 ± 11              | 74 ± 13                    |
| A (cm/sec)                                     | 48 ± 9               | 55 ± 13 <sup>a</sup>       |
| E/A ratio                                      | 1.7 ± 0.3            | 1.4 ± 0.3 <sup>b</sup>     |
| IRT (msec)                                     | 84 ± 8               | 94 ± 13 <sup>b</sup>       |

FS, fractional shortening; mVCF, mean velocity of circumferential fiber shortening; IRT, isovolumetric relaxation time; SVR, systemic vascular resistance.

<sup>a</sup>  $P < 0.05$ , vs. control subjects.

<sup>b</sup>  $P < 0.001$ .

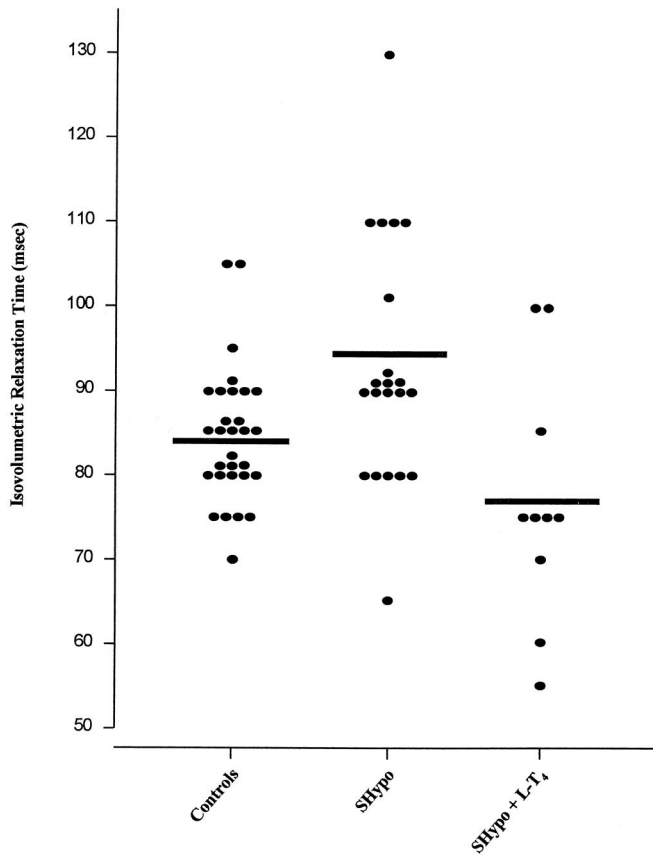

FIG. 1. Individual values of isovolumetric relaxation time (IRT) in controls and in patients with SHypo before (SHypo) and after (SHypo + L-T<sub>4</sub>) L-T<sub>4</sub> replacement therapy.

TABLE 4. Echocardiographic parameters of left ventricular morphology in subclinical hypothyroid patients before and after L-T<sub>4</sub> replacement therapy

|                      | SHypo patients (n = 10) |               |
|----------------------|-------------------------|---------------|
|                      | Before therapy          | After therapy |
| LVEDD (mm)           | 47.5 ± 4                | 47 ± 3        |
| LVESD (mm)           | 30 ± 4                  | 28.5 ± 4      |
| Diastolic IVST (mm)  | 9.8 ± 0.6               | 9.5 ± 1.1     |
| Diastolic LVPWT (mm) | 8.7 ± 0.9               | 8.4 ± 0.7     |
| LVMi (g)             | 87 ± 20                 | 82 ± 11       |

trast, Doppler indices of diastolic function were normalized by L-T<sub>4</sub> therapy, whereas systolic function improved. In particular, the isovolumetric relaxation time shortened significantly to values comparable with those of normal subjects (Fig. 1), and the E/A ratio increased significantly. Fractional shortening, mean velocity of circumferential fiber shortening, and mean aortic acceleration were all enhanced by L-T<sub>4</sub> therapy, although they were still in the normal range. Moreover, CO increased slightly, but not significantly, whereas SVR was reduced by L-T<sub>4</sub> treatment, although it was not significantly different from the mean value of the control subjects.

### Discussion

The results of the present study demonstrate that abnormal LV diastolic filling (suggestive of impaired LV relax-

TABLE 5. Doppler-echocardiographic parameters of left ventricular function in subclinical hypothyroid patients before and after L-T<sub>4</sub> replacement therapy

|                                                | SHypo patients (n = 10) |                         |
|------------------------------------------------|-------------------------|-------------------------|
|                                                | Before therapy          | After therapy           |
| <b>Systolic function</b>                       |                         |                         |
| FS (%)                                         | 37 ± 5                  | 39 ± 7 <sup>a</sup>     |
| mVCF (circ/sec)                                | 1.2 ± 0.2               | 1.3 ± 0.2 <sup>a</sup>  |
| Mean aortic acceleration (m/sec <sup>2</sup> ) | 9.3 ± 1.3               | 11.1 ± 2.3 <sup>a</sup> |
| Peak aortic flow velocity (cm/sec)             | 0.9 ± 0.2               | 0.9 ± 0.1               |
| Cardiac Output (mL)                            | 5330 ± 1640             | 5806 ± 1758             |
| SVR (dynes/sec · cm <sup>-5</sup> )            | 1497 ± 415              | 1361 ± 383 <sup>b</sup> |
| <b>Diastolic function</b>                      |                         |                         |
| E (cm/sec)                                     | 78 ± 12                 | 85 ± 14 <sup>b</sup>    |
| A (cm/sec)                                     | 60 ± 12                 | 51 ± 13 <sup>a</sup>    |
| E/A ratio                                      | 1.3 ± 0.3               | 1.7 ± 0.4 <sup>c</sup>  |
| IRT (msec)                                     | 91 ± 8                  | 77 ± 15 <sup>b</sup>    |

<sup>a</sup> P < 0.01 vs. before therapy.

<sup>b</sup> P < 0.05.

<sup>c</sup> P < 0.001.

ation) is a common finding in patients with SHypo and that this abnormality may be reversed by a short-term substitutive L-T<sub>4</sub> therapy.

Cardiac function has been previously evaluated in patients with SHypo, by systolic time intervals, with conflicting results (19–25). Some authors reported prolonged systolic time intervals in SHypo (19–21), which improved after L-T<sub>4</sub> therapy, particularly in those patients with more marked basal abnormalities (20). In contrast, Tseng *et al.* found that the isovolumetric contraction time, the preejection period, and the ratio of preejection period to LV ejection time were normal in patients with SHypo (25), as assessed by simultaneous recording of aortic and mitral flow velocities.

Arem *et al.*, using Doppler echocardiography at rest and during exercise in eight patients with SHypo, found normal cardiac structure and function, and mild prolongation of the preejection period during exercise and slightly reduced LV diastolic dimensions at rest (26).

Bell *et al.* showed, by radionuclide ventriculography, that patients with SHypo have normal ejection fraction at rest, with a small (but significant) increase in LV ejection fraction during maximal exercise after L-T<sub>4</sub> therapy (27). Forfar *et al.* also reported a blunted increase in ejection fraction during exercise, with a clear improvement in this parameter after L-T<sub>4</sub> replacement therapy (28). Moreover, Foldes *et al.* found a lower ejection fraction, both at rest and during physical exercise, in patients with SHypo, as compared with normal subjects (29).

The discrepant results reported in previous studies of cardiac involvement in SHypo might be, in part, related to the different patient selection (age, inclusion of patients with previous hyperthyroidism, evaluation of patients with acute or unstable SHypo) and to the different diagnostic criteria (too-large range of TSH levels).

In the present study, we performed a strict selection of patients with stable SHypo, excluding patients with confounding factors particularly affecting the cardiovascular system. The impaired diastolic function in this group of patients suggests that SHypo is a condition of minimal tissue hypothyroidism rather than a compensated state. If this is the case, the patients with SHypo should all be considered as potential candidates for therapy with L-T<sub>4</sub>.

The idea that SHypo should be treated is also supported by a recent study from Perk *et al.*, who found greater progression of left coronary angiographic lesions in hypothyroid patients with TSH levels in the range seen in SHypo, compared with patients whose TSH levels were assiduously maintained in the normal range (30).

An impairment of diastolic function is a common finding in many cardiac diseases, and it often precedes and causes systolic dysfunction (31). It has been documented that 30–40% of heart failure syndromes are secondary to impaired diastolic function (31). Therefore, the diastolic dysfunction observed in the current study could be the prelude to more serious limitations of cardiac function and physical performance. In this regard, our finding may be causally related to the blunted increase of LV ejection fraction during exercise observed in patients with SHypo (27, 28).

There is a seeming discrepancy between the results of the present study and our previous findings in subclinical hyperthyroidism (14). Specifically, both subclinical hyperthyroidism and hypothyroidism patients show similar diastolic abnormalities despite opposite hormonal patterns. However, subclinical hyperthyroidism is associated with mild LV hypertrophy, whose well-known deleterious consequences on diastolic function (31) may prevail over the enhanced relaxation induced by thyroid hormone excess (32). On the other hand, SHypo may impair directly diastolic function by reducing sarcoplasmic calcium ATPase activity, with consequent impairment of ventricular diastolic function (33).

Among the indices of systolic function, only mean aortic acceleration was significantly reduced in the group of patients with SHypo. Therefore, this index seems to be the most susceptible to variations in thyroid hormone levels. Furthermore, in the groups of patients with SHypo treated with replacement L-T<sub>4</sub> therapy, SVR was significantly reduced, which confirms a direct vasodilatory effect of thyroid hormone (34).

Doppler-echocardiography represents a simple and reliable method for the evaluation of morphology and function in patients with SHypo. An additional advantage is its easy repeatability and, therefore, it could be used to serially evaluate the adequacy and efficacy of L-T<sub>4</sub> dose. To support this concept, in the subgroup of patients treated with substitutive doses of L-T<sub>4</sub>, the echo-Doppler evaluation performed after 6 months demonstrated an improvement of cardiac function.

In conclusion, the results of this study show that diastolic function is impaired in patients with stable SHypo. This abnormality is reversible after 6 months of substitutive L-T<sub>4</sub> therapy. Doppler-echocardiography may be considered a reliable method for a cross-sectional and longitudinal assessment of left ventricular diastolic function in patients with SHypo.

## References

- Singer PA, Cooper DS, Levey EG, Ladenson PW, Braverman LE, Daniels G. 1995 Treatment guidelines for patients with hyperthyroidism and hypothyroidism. *JAMA*. 273:808–812.
- Cooper DS. 1998 Subclinical thyroid disease: a clinician's perspective. *Ann Intern Med*. 129:135–138.
- Helfand M, Redfern CC. 1998 Screening for thyroid disease: an update. *Ann Intern Med*. 129:144–158.
- Caron PH, Calazel C, Pazna HJ, Haff M, Lonvet JP. 1990 Decreased LDL cholesterol in subclinical hypothyroidism: the effect of L-thyroxine therapy. *Clin Endocrinol (Oxf)*. 33:519–523.
- Arem R, Patsch W. 1990 Lipoprotein and apolipoprotein levels in subclinical hypothyroidism: effect of levothyroxine in therapy. *Arch Intern Med*. 150:2097–2100.
- Franklyn JA, Daykin J, Betteridge J, et al. 1993 Thyroxine replacement therapy and circulating lipid concentrations. *Clin Endocrinol (Oxf)*. 38:453–459.
- Miura S, Iitaka M, Yoshimura H, et al. 1994 Disturbed lipid metabolism in patients with subclinical hypothyroidism: effect of L-thyroxine therapy. *Intern Med*. 33:413–417.
- Tanis BC, Westendorp GJ, Smelt HM. 1996 Effect of thyroid substitution on hypercholesterolaemia in patients with subclinical hypothyroidism: a reanalysis of intervention studies. *Clin Endocrinol (Oxf)*. 44:643–649.
- Yildirimkaya M, Ozata M, Yilmaz K, Kilinc C, Gundogan MA, Kutluay T. 1996 Lipoprotein(a) concentration in subclinical hypothyroidism before and after levo-thyroxine therapy. *Endocr J*. 43:731–736.
- Danese MD, Powe N, Sawin CT, Ladenson PW. 1996 Screening for mild thyroid failure at the periodic health examination: a decision and cost-effectiveness analysis. *JAMA*. 276:285–292.
- Mandel SJ, Brent GA, Larsen PR. 1993 Levothyroxine therapy in patients with thyroid disease. *Ann Intern Med*. 119:492–502.
- Toft AD. 1994 Thyroxine therapy. *New Engl J Med*. 331:174–180.
- Fazio S, Cittadini A, Sabatini D, et al. 1993 Evidence of biventricular involvement in acromegaly: a Doppler echocardiographic study. *Eur Heart J*. 14:26–33.
- Fazio S, Biondi B, Carella C, et al. 1995 Diastolic dysfunction in patients on thyroid-stimulating hormone suppressive therapy with levothyroxine: beneficial effect of  $\beta$ -blockade. *J Clin Endocrinol Metab*. 80:2222–2226.
- Biondi B, Fazio S, Carella C, et al. 1993 Cardiac effects of long-term thyrotropin-suppressive therapy with levothyroxine. *J Clin Endocrinol Metab*. 77:334–338.
- Teichholz LE, Kreulen T, Herman MV, Gorlin R. 1976 Problems in echocardiographic volume determinations: echocardiographic-angiographic correlations in the presence or absence of asynergy. *Am J Cardiol*. 37:7–11.
- Grossman W. 1986 Cardiac catheterization and angiography. 3rd ed. Philadelphia: Lea & Febiger; 137.
- Bennet ED, Barclay SA, Davis AI, Mannering D, Mehta N. 1984 Ascending aorta blood velocity and acceleration using Doppler ultrasound in the assessment of left ventricle function. *Cardiovasc Res*. 18:632–638.
- Ridgway EC, Cooper DS, Walker H, Rodbard D, Maloof F. 1981 Peripheral responses to thyroid hormone before and after L-thyroxine therapy in patients with subclinical hypothyroidism. *J Clin Endocrinol Metab*. 53:1238–1242.
- Cooper DS, Halpern R, Wood LC, Levin AA, Ridgway EC. 1984 L-thyroxine therapy in subclinical hypothyroidism. A double-blind placebo-controlled trial. *Ann Intern Med*. 101:18–24.
- Nystrom E, Caidahl K, Fager G, Wikkelso C, Lundberg PA, Lindstedt G. 1988 A double-blind cross-over 12-month study of L-thyroxine treatment of women with subclinical hypothyroidism. *Clin Endocrinol (Oxf)*. 29:63–76.
- Staub JJ, Althaus BU, Engler H, et al. 1992 Spectrum of subclinical and overt hypothyroidism: effect on thyrotropin, prolactin and thyroid reserve and metabolic impact on peripheral target tissues. *Am J Med*. 92:631–642.
- Bough EW, Crowley WF, Ridgway EC, et al. 1987 Myocardial function in hypothyroidism: relation to disease severity and response to treatment. *Arch Intern Med*. 138:1476–1480.
- Ooi Tc, Whitlock RML, Frengley PA, Ibbertson HK. 1980 Systolic time intervals and ankle reflex time in patients with minimal serum TSH elevation; response to triiodothyronine therapy. *Clin Endocrinol (Oxf)*. 13:621–627.
- Tseng KH, Walfish PG, Persand JA, Gilbert BW. 1989 Concurrent aortic and mitral valve echocardiography permits measurement of systolic time intervals as an index of peripheral tissue thyroid function status. *J Clin Endocrinol Metab*. 69:633–638.
- Arem K, Rokey R, Kiefe C, Escalante DA, Rodriguez A. 1996 Cardiac systolic and diastolic function at rest and exercise in subclinical hypothyroidism: effect of thyroid hormone therapy. *Thyroid*. 6:397–402.
- Bell GM, Todd WTA, Forfar JC, et al. 1985 End-organ responses to thyroxine therapy in subclinical hypothyroidism. *Clin Endocrinol (Oxf)*. 22:83–89.
- Forfar JC, Wathen CG, Todd WT, et al. 1985 Left ventricular performance in subclinical hypothyroidism. *Am J Med*. 57:857–865.
- Foldes J, Istvanfy M, Halmagyi H, Varadi A, Gara A, Partos O. 1987 Hypothyroidism and the heart. Examination of left ventricular function in subclinical hypothyroidism. *Acta Med Hung*. 44:337–347.
- Perk M, O'Neill BJ. 1997 The effect of thyroid hormone therapy on angiographic coronary artery disease progression. *Can J Cardiol*. 13:273–276.
- Grossman W. 1991 Diastolic dysfunction in congestive heart failure. *N Engl J Med*. 28:1557–1564.
- Minz G, Pizzarello R, Klein I. 1991 Enhanced left ventricular diastolic function in hyperthyroidism: noninvasive assessment and response to treatment. *J Clin Endocrinol Metab*. 73:146–150.
- Rohrer D, Dillmann WH. 1988 Thyroid hormone markedly increases the mRNA coding for sarcoplasmic reticulum Ca<sup>2+</sup>-ATPase in rat heart. *J Biol Chem*. 263:6941–6944.
- Ojamaa K, Balkman C, Klein I. 1993 Acute effects of triiodothyronine on arterial smooth muscle cells. *Ann Thorac Surg*. 56:561–567.
